# Supplementary material for: Pursuing colloidal diamonds
Source: Royal Society of Chemistry journal article supplement (doi:10.1039/d3nr01771k), 2023-01-01
Supplement: d3nr01771k2.pdf [file d3nr01771k2.pdf]

## Pursuing Colloidal Diamond Supplementary Movies

Łukasz Baran, Dariusz Tarasewicz, Daniel M. Kamiński, Wojciech Rżysko

- Movie S1 - Time evolution of the external field-driven assembly from disordered state to the formation of stacking hybrids of cubic and hexagonal diamond for the system with  $\xi = 0.4$  at  $T^* = 0.30$ .
- Movie S2 - Time evolution of the external field-driven assembly from disordered state to the selective formation of cubic diamond for the system with  $\xi = 1.0$  at  $T^* = 0.30$ .
